# Supplementary material for: Transition to Fast Whole-Body SPECT/CT Bone Imaging: An Assessment of Image Quality
Source: Diagnostics (Basel). 2022 Nov 24;12(12):2938. doi: 10.3390/diagnostics12122938 (PMC9776819; doi:10.3390/diagnostics12122938)
Supplement: Supplementary file 1 [file diagnostics-12-02938-s001.zip › Table S1.pdf]

Table S1. Image quality assessment,  $p$  value between every two acquisition periods.

| <b>Image quality (4 iterations)</b>  |      |                   |
|--------------------------------------|------|-------------------|
| Acquisition protocol                 |      | $p$ -value        |
| 180s                                 | 360s | <b>0.499</b>      |
| 180s                                 | 480s | <b>0.007*</b>     |
| 180s                                 | 900s | <b>&lt; .001*</b> |
| 180s                                 | 450s | <b>0.027*</b>     |
| 360s                                 | 480s | <b>0.194</b>      |
| 360s                                 | 900s | <b>0.011*</b>     |
| 360s                                 | 450s | <b>0.562</b>      |
| 480s                                 | 900s | <b>0.799</b>      |
| 480s                                 | 450s | <b>0.862</b>      |
| 900s                                 | 450s | <b>0.097</b>      |
| <b>Image quality (8 iterations)</b>  |      |                   |
| Acquisition protocol                 |      | $p$ -value        |
| 180s                                 | 360s | <b>0.212</b>      |
| 180s                                 | 480s | <b>0.001*</b>     |
| 180s                                 | 900s | <b>&lt; .001*</b> |
| 180s                                 | 450s | <b>0.001*</b>     |
| 360s                                 | 480s | <b>0.036*</b>     |
| 360s                                 | 900s | <b>0.001*</b>     |
| 360s                                 | 450s | <b>0.091</b>      |
| 480s                                 | 900s | <b>0.862</b>      |
| 480s                                 | 450s | <b>0.827</b>      |
| 900s                                 | 450s | <b>0.184</b>      |
| <b>Image quality (12 iterations)</b> |      |                   |
| Acquisition protocol                 |      | $p$ -value        |
| 180s                                 | 360s | <b>0.250</b>      |
| 180s                                 | 480s | <b>0.041*</b>     |
| 180s                                 | 900s | <b>0.001*</b>     |
| 180s                                 | 450s | <b>0.010*</b>     |
| 360s                                 | 480s | <b>0.631</b>      |
| 360s                                 | 900s | <b>0.005*</b>     |
| 360s                                 | 450s | <b>0.124</b>      |
| 480s                                 | 900s | <b>0.182</b>      |
| 480s                                 | 450s | <b>0.840</b>      |
| 900s                                 | 450s | <b>0.556</b>      |
| <b>Image quality (16 iterations)</b> |      |                   |
| Acquisition protocol                 |      | $p$ -value        |
| 180s                                 | 360s | <b>0.774</b>      |
| 180s                                 | 480s | <b>0.028*</b>     |
| 180s                                 | 900s | <b>0.014*</b>     |
| 180s                                 | 450s | <b>0.028*</b>     |
| 360s                                 | 480s | <b>0.602</b>      |
| 360s                                 | 900s | <b>0.054*</b>     |
| 360s                                 | 450s | <b>0.602</b>      |
| 480s                                 | 900s | <b>0.731</b>      |
| 480s                                 | 450s | <b>1.000</b>      |
| 900s                                 | 450s | <b>0.731</b>      |
