# Supplementary material for: Transition to Fast Whole-Body SPECT/CT Bone Imaging: An Assessment of Image Quality
Source: Diagnostics (Basel). 2022 Nov 24;12(12):2938. doi: 10.3390/diagnostics12122938 (PMC9776819; doi:10.3390/diagnostics12122938)
Supplement: Supplementary file 1 [file diagnostics-12-02938-s001.zip › Table S2.pdf]

Table S2. Image noise assessment, P value between every two acquisition periods.

| <b>Image noise (4 iterations)</b>  |      |                   |
|------------------------------------|------|-------------------|
| Acquisition protocol               |      | p-value           |
| 180s                               | 360s | <b>0.958</b>      |
| 180s                               | 480s | <b>0.011*</b>     |
| 180s                               | 900s | <b>&lt; .001*</b> |
| 180s                               | 450s | <b>0.039*</b>     |
| 360s                               | 480s | <b>0.042*</b>     |
| 360s                               | 900s | <b>0.001*</b>     |
| 360s                               | 450s | <b>0.110</b>      |
| 480s                               | 900s | <b>0.012*</b>     |
| 480s                               | 450s | <b>0.930</b>      |
| 900s                               | 450s | <b>0.0004*</b>    |
| <b>Image noise (8 iterations)</b>  |      |                   |
| Acquisition protocol               |      | p-value           |
| 180s                               | 360s | <b>0.130</b>      |
| 180s                               | 480s | <b>&lt; .001*</b> |
| 180s                               | 900s | <b>&lt; .001*</b> |
| 180s                               | 450s | <b>&lt; .001*</b> |
| 360s                               | 480s | <b>0.238</b>      |
| 360s                               | 900s | <b>0.021*</b>     |
| 360s                               | 450s | <b>0.317</b>      |
| 480s                               | 900s | <b>0.429</b>      |
| 480s                               | 450s | <b>1.00</b>       |
| 900s                               | 450s | <b>0.542</b>      |
| <b>Image noise (12 iterations)</b> |      |                   |
| Acquisition protocol               |      | p-value           |
| 180s                               | 360s | <b>0.143</b>      |
| 180s                               | 480s | <b>0.004*</b>     |
| 180s                               | 900s | <b>0.002*</b>     |
| 180s                               | 450s | <b>0.011*</b>     |
| 360s                               | 480s | <b>0.494</b>      |
| 360s                               | 900s | <b>0.021*</b>     |
| 360s                               | 450s | <b>0.418</b>      |
| 480s                               | 900s | <b>0.131</b>      |
| 480s                               | 450s | <b>0.973</b>      |
| 900s                               | 450s | <b>0.638</b>      |
| <b>Image noise (16 iterations)</b> |      |                   |
| Acquisition protocol               |      | p-value           |
| 180s                               | 360s | <b>0.615</b>      |
| 180s                               | 480s | <b>0.009*</b>     |
| 180s                               | 900s | <b>0.002*</b>     |
| 180s                               | 450s | <b>0.010*</b>     |
| 360s                               | 480s | <b>0.721</b>      |
| 360s                               | 900s | <b>0.050*</b>     |
| 360s                               | 450s | <b>0.614</b>      |
| 480s                               | 900s | <b>0.143</b>      |
| 480s                               | 450s | <b>0.998</b>      |
| 900s                               | 450s | <b>0.320</b>      |
