# Supplementary material for: Transition to Fast Whole-Body SPECT/CT Bone Imaging: An Assessment of Image Quality
Source: Diagnostics (Basel). 2022 Nov 24;12(12):2938. doi: 10.3390/diagnostics12122938 (PMC9776819; doi:10.3390/diagnostics12122938)
Supplement: Supplementary file 1 [file diagnostics-12-02938-s001.zip › Table S3.pdf]

Table S3. Diagnostic confidence assessment, P value between every two acquisition periods.

| <b>Diagnostic confidence (4 iterations)</b>  |      |                   |
|----------------------------------------------|------|-------------------|
| Acquisition protocol                         |      | p-value           |
| 180s                                         | 360s | <b>0.467</b>      |
| 180s                                         | 480s | <b>0.017*</b>     |
| 180s                                         | 900s | <b>&lt; .001*</b> |
| 180s                                         | 450s | <b>0.020*</b>     |
| 360s                                         | 480s | <b>0.267</b>      |
| 360s                                         | 900s | <b>0.003*</b>     |
| 360s                                         | 450s | <b>0.267</b>      |
| 480s                                         | 900s | <b>0.125</b>      |
| 480s                                         | 450s | <b>0.997</b>      |
| 900s                                         | 450s | <b>0.458</b>      |
| <b>Diagnostic confidence (8 iterations)</b>  |      |                   |
| Acquisition protocol                         |      | p-value           |
| 180s                                         | 360s | <b>0.034*</b>     |
| 180s                                         | 480s | <b>&lt; .001*</b> |
| 180s                                         | 900s | <b>&lt; .001*</b> |
| 180s                                         | 450s | <b>&lt; .001*</b> |
| 360s                                         | 480s | <b>0.374</b>      |
| 360s                                         | 900s | <b>0.115</b>      |
| 360s                                         | 450s | <b>0.376</b>      |
| 480s                                         | 900s | <b>0.968</b>      |
| 480s                                         | 450s | <b>0.996</b>      |
| 900s                                         | 450s | <b>0.777</b>      |
| <b>Diagnostic confidence (12 iterations)</b> |      |                   |
| Acquisition protocol                         |      | p-value           |
| 180s                                         | 360s | <b>0.644</b>      |
| 180s                                         | 480s | <b>0.087</b>      |
| 180s                                         | 900s | <b>0.002*</b>     |
| 180s                                         | 450s | <b>0.045*</b>     |
| 360s                                         | 480s | <b>0.451</b>      |
| 360s                                         | 900s | <b>0.006*</b>     |
| 360s                                         | 450s | <b>0.268</b>      |
| 480s                                         | 900s | <b>0.546</b>      |
| 480s                                         | 450s | <b>0.999</b>      |
| 900s                                         | 450s | <b>0.690</b>      |
| <b>Diagnostic confidence (16 iterations)</b> |      |                   |
| Acquisition protocol                         |      | p-value           |
| 180s                                         | 360s | <b>0.914</b>      |
| 180s                                         | 480s | <b>0.036*</b>     |
| 180s                                         | 900s | <b>0.006*</b>     |
| 180s                                         | 450s | <b>0.034*</b>     |
| 360s                                         | 480s | <b>0.394</b>      |
| 360s                                         | 900s | <b>0.082</b>      |
| 360s                                         | 450s | <b>0.320</b>      |
| 480s                                         | 900s | <b>0.798</b>      |
| 480s                                         | 450s | <b>0.998</b>      |
| 900s                                         | 450s | <b>0.959</b>      |
