# Supplementary material for: Transition to Fast Whole-Body SPECT/CT Bone Imaging: An Assessment of Image Quality
Source: Diagnostics (Basel). 2022 Nov 24;12(12):2938. doi: 10.3390/diagnostics12122938 (PMC9776819; doi:10.3390/diagnostics12122938)
Supplement: Supplementary file 1 [file diagnostics-12-02938-s001.zip › Table S4.pdf]

**Table S4.** The results were evaluated individually for each reader comparing iterations numbers (4-16) and corresponding p values in different acquisition time for all three categories (image quality, image noise and diagnostic confidence).

| Reader 1                 |  | Reference images 900s |      |      |      | Overall<br>average | <i>p</i><br>value | 480s |      |      |      | Overall<br>average | <i>p</i><br>value | 450s |      |      |      | Overall<br>average | <i>p</i><br>value | 360s |       |      |      | Overall<br>average | <i>p</i><br>value | 180s |      |      |      | Overall<br>average | <i>p</i><br>value |
|--------------------------|--|-----------------------|------|------|------|--------------------|-------------------|------|------|------|------|--------------------|-------------------|------|------|------|------|--------------------|-------------------|------|-------|------|------|--------------------|-------------------|------|------|------|------|--------------------|-------------------|
|                          |  | 4                     | 8    | 12   | 16   |                    |                   | 4    | 8    | 12   | 16   |                    |                   | 4    | 8    | 12   | 16   |                    |                   | 4    | 8     | 12   | 16   |                    |                   | 4    | 8    | 12   | 16   |                    |                   |
| Image<br>quality         |  | 3.60                  | 3.20 | 2.80 | 2.40 | <b>3.00</b>        | ±<br><b>0.07</b>  | 3.00 | 3.00 | 2.80 | 2.40 | <b>2.65</b>        | ±<br><b>0.11</b>  | 2.60 | 2.40 | 2.60 | 2.20 | <b>2.45</b>        | ±<br><b>0.58</b>  | 1.80 | 2.00  | 2.20 | 1.80 | <b>1.95</b>        | ±<br><b>0.64</b>  | 1.60 | 1.40 | 1.60 | 1.60 | <b>1.55</b>        | ±<br><b>0.89</b>  |
|                          |  | ±                     | ±    | ±    | ±    |                    |                   | ±    | ±    | ±    | ±    |                    |                   | ±    | ±    | ±    | ±    |                    |                   | ±    | ±     | ±    | ±    |                    |                   | ±    | ±    | ±    | ±    |                    |                   |
|                          |  | 0.54                  | 0.83 | 0.44 | 0.89 |                    |                   | 0.70 | 0.70 | 0.44 | 0.54 |                    |                   | 0.54 | 0.54 | 0.54 | 0.44 |                    |                   | 0.44 | 0.00  | 0.44 | 0.83 |                    |                   | 0.89 | 0.54 | 0.54 | 0.54 |                    |                   |
| Image noise              |  | 4.00                  | 3.40 | 3.40 | 3.20 | <b>3.50</b>        | ±<br><b>0.27</b>  | 3.20 | 3.00 | 3.00 | 2.80 | <b>3.00</b>        | ±<br><b>0.57</b>  | 3.00 | 3.20 | 3.20 | 2.60 | <b>3.00</b>        | ±<br><b>0.33</b>  | 2.00 | 2.60  | 2.80 | 2.20 | <b>2.40</b>        | ±<br><b>0.21</b>  | 2.00 | 1.60 | 2.00 | 1.80 | <b>1.85</b>        | ±<br><b>0.58</b>  |
|                          |  | ±                     | ±    | ±    | ±    |                    |                   | ±    | ±    | ±    | ±    |                    |                   | ±    | ±    | ±    | ±    |                    |                   | ±    | ±     | ±    | ±    |                    |                   | ±    | ±    | ±    | ±    |                    |                   |
|                          |  | 0.00                  | 0.89 | 0.89 | 0.83 |                    |                   | 0.44 | 0.00 | 0.70 | 0.44 |                    |                   | 0.70 | 0.44 | 0.83 | 0.89 |                    |                   | 0.00 | 0.54  | 0.44 | 1.10 |                    |                   | 0.00 | 0.54 | 0.00 | 0.44 |                    |                   |
| Diagnostic<br>confidence |  | 4.00                  | 3.40 | 3.80 | 3.20 | <b>3.60</b>        | ±<br><b>0.23</b>  | 3.00 | 3.20 | 3.20 | 3.00 | <b>3.10</b>        | ±<br><b>0.97</b>  | 3.20 | 3.20 | 3.40 | 2.80 | <b>3.15</b>        | ±<br><b>0.86</b>  | 2.40 | 2.60  | 2.60 | 2.00 | <b>2.40</b>        | ±<br><b>0.75</b>  | 1.80 | 1.60 | 2.20 | 2.00 | <b>1.90</b>        | ±<br><b>0.39</b>  |
|                          |  | ±                     | ±    | ±    | ±    |                    |                   | ±    | ±    | ±    | ±    |                    |                   | ±    | ±    | ±    | ±    |                    |                   | ±    | ±     | ±    | ±    |                    |                   | ±    | ±    | ±    | ±    |                    |                   |
|                          |  | 0.00                  | 0.89 | 0.44 | 0.83 |                    |                   | 0.83 | 0.83 | 0.83 | 0.70 |                    |                   | 0.83 | 0.44 | 0.89 | 1.10 |                    |                   | 0.89 | 0.54  | 0.54 | 1.00 |                    |                   | 1.10 | 0.54 | 1.10 | 0.70 |                    |                   |
| Reader 2                 |  | Reference images 900s |      |      |      | Overall<br>average | <i>p</i><br>value | 480s |      |      |      | Overall<br>average | <i>p</i><br>value | 450s |      |      |      | Overall<br>average | <i>p</i><br>value | 360s |       |      |      | Overall<br>average | <i>p</i><br>value | 180s |      |      |      | Overall<br>average | <i>p</i><br>value |
|                          |  | 4                     | 8    | 12   | 16   |                    |                   | 4    | 8    | 12   | 16   |                    |                   | 4    | 8    | 12   | 16   |                    |                   | 4    | 8     | 12   | 16   |                    |                   | 4    | 8    | 12   | 16   |                    |                   |
| Image<br>quality         |  | 3.40                  | 3.20 | 3.00 | 3.00 | <b>3.15</b>        | ±<br><b>0.19</b>  | 3.20 | 2.80 | 2.60 | 2.60 | <b>2.80</b>        | ±<br><b>0.32</b>  | 3.00 | 2.80 | 2.60 | 2.80 | <b>2.80</b>        | ±<br><b>0.66</b>  | 2.80 | 2.0 ± | 1.80 | 2.20 | <b>2.20</b>        | ±<br><b>0.17</b>  | 1.80 | 1.60 | 1.40 | 1.60 | <b>1.60</b>        | ±<br><b>0.57</b>  |
|                          |  | ±                     | ±    | ±    | ±    |                    |                   | ±    | ±    | ±    | ±    |                    |                   | ±    | ±    | ±    | ±    |                    |                   | ±    | 2.0 ± | ±    | ±    |                    |                   | ±    | ±    | ±    | ±    |                    |                   |
|                          |  | 0.36                  | 0.44 | 0.00 | 0.00 |                    |                   | 0.83 | 0.83 | 0.54 | 0.89 |                    |                   | 0.70 | 0.44 | 0.54 | 0.44 |                    |                   | 0.83 | 0.70  | 0.44 | 0.83 |                    |                   | 0.83 | 0.54 | 0.54 | 0.54 |                    |                   |
| Image noise              |  | 4.00                  | 3.80 | 3.80 | 3.60 | <b>3.80</b>        | ±<br><b>0.49</b>  | 3.40 | 3.20 | 2.80 | 2.60 | <b>3.00</b>        | ±<br><b>0.15</b>  | 3.20 | 3.10 | 3.00 | 3.00 | <b>3.07</b>        | ±<br><b>0.91</b>  | 2.60 | 2.20  | 2.00 | 2.20 | <b>2.25</b>        | ±<br><b>0.64</b>  | 2.00 | 1.60 | 1.40 | 1.60 | <b>1.65</b>        | ±<br><b>0.09</b>  |
|                          |  | ±                     | ±    | ±    | ±    |                    |                   | ±    | ±    | ±    | ±    |                    |                   | ±    | ±    | ±    | ±    |                    |                   | ±    | ±     | ±    | ±    |                    |                   | ±    | ±    | ±    | ±    |                    |                   |
|                          |  | 0.00                  | 0.44 | 0.44 | 0.54 |                    |                   | 0.54 | 0.83 | 0.44 | 0.54 |                    |                   | 0.44 | 1.00 | 1.00 | 0.00 |                    |                   | 0.89 | 1.09  | 0.70 | 0.83 |                    |                   | 0.70 | 0.54 | 0.54 | 0.54 |                    |                   |
| Diagnostic<br>confidence |  | 3.40                  | 3.20 | 3.00 | 3.00 | <b>3.15</b>        | ±<br><b>0.19</b>  | 3.20 | 3.00 | 2.60 | 2.60 | <b>2.85</b>        | ±<br><b>0.39</b>  | 3.20 | 2.80 | 2.60 | 3.00 | <b>2.90</b>        | ±<br><b>0.46</b>  | 2.60 | 2.40  | 2.00 | 2.20 | <b>2.30</b>        | ±<br><b>0.45</b>  | 2.00 | 1.60 | 1.40 | 1.60 | <b>1.65</b>        | ±<br><b>0.22</b>  |
|                          |  | ±                     | ±    | ±    | ±    |                    |                   | ±    | ±    | ±    | ±    |                    |                   | ±    | ±    | ±    | ±    |                    |                   | ±    | 2.40  | ±    | ±    |                    |                   | ±    | ±    | ±    | ±    |                    |                   |
|                          |  | 0.54                  | 0.44 | 0.00 | 0.00 |                    |                   | 0.44 | 0.70 | 0.89 | 0.54 |                    |                   | 0.83 | 0.44 | 0.54 | 0.00 |                    |                   | 0.54 | 0.89  | 0.70 | 0.83 |                    |                   | 0.54 | 0.54 | 0.54 | 0.54 |                    |                   |

**The mean value ± SD** represents the mean score of 5 patient's image, evaluated individually for each reader.  
***p* values\*** Significance value between different numbers of iterations for a given duration of acquis
